# Supplementary material for: Analysis of gut microbiome profiles in common marmosets (Callithrix jacchus) in health and intestinal disease
Source: PubMed Central journal article supplement (PMC8924212; doi:10.1038/s41598-022-08255-4), 2022-03-15

Supp. Fig 6 Biological Processes enriched in the jejunum of IBD cases

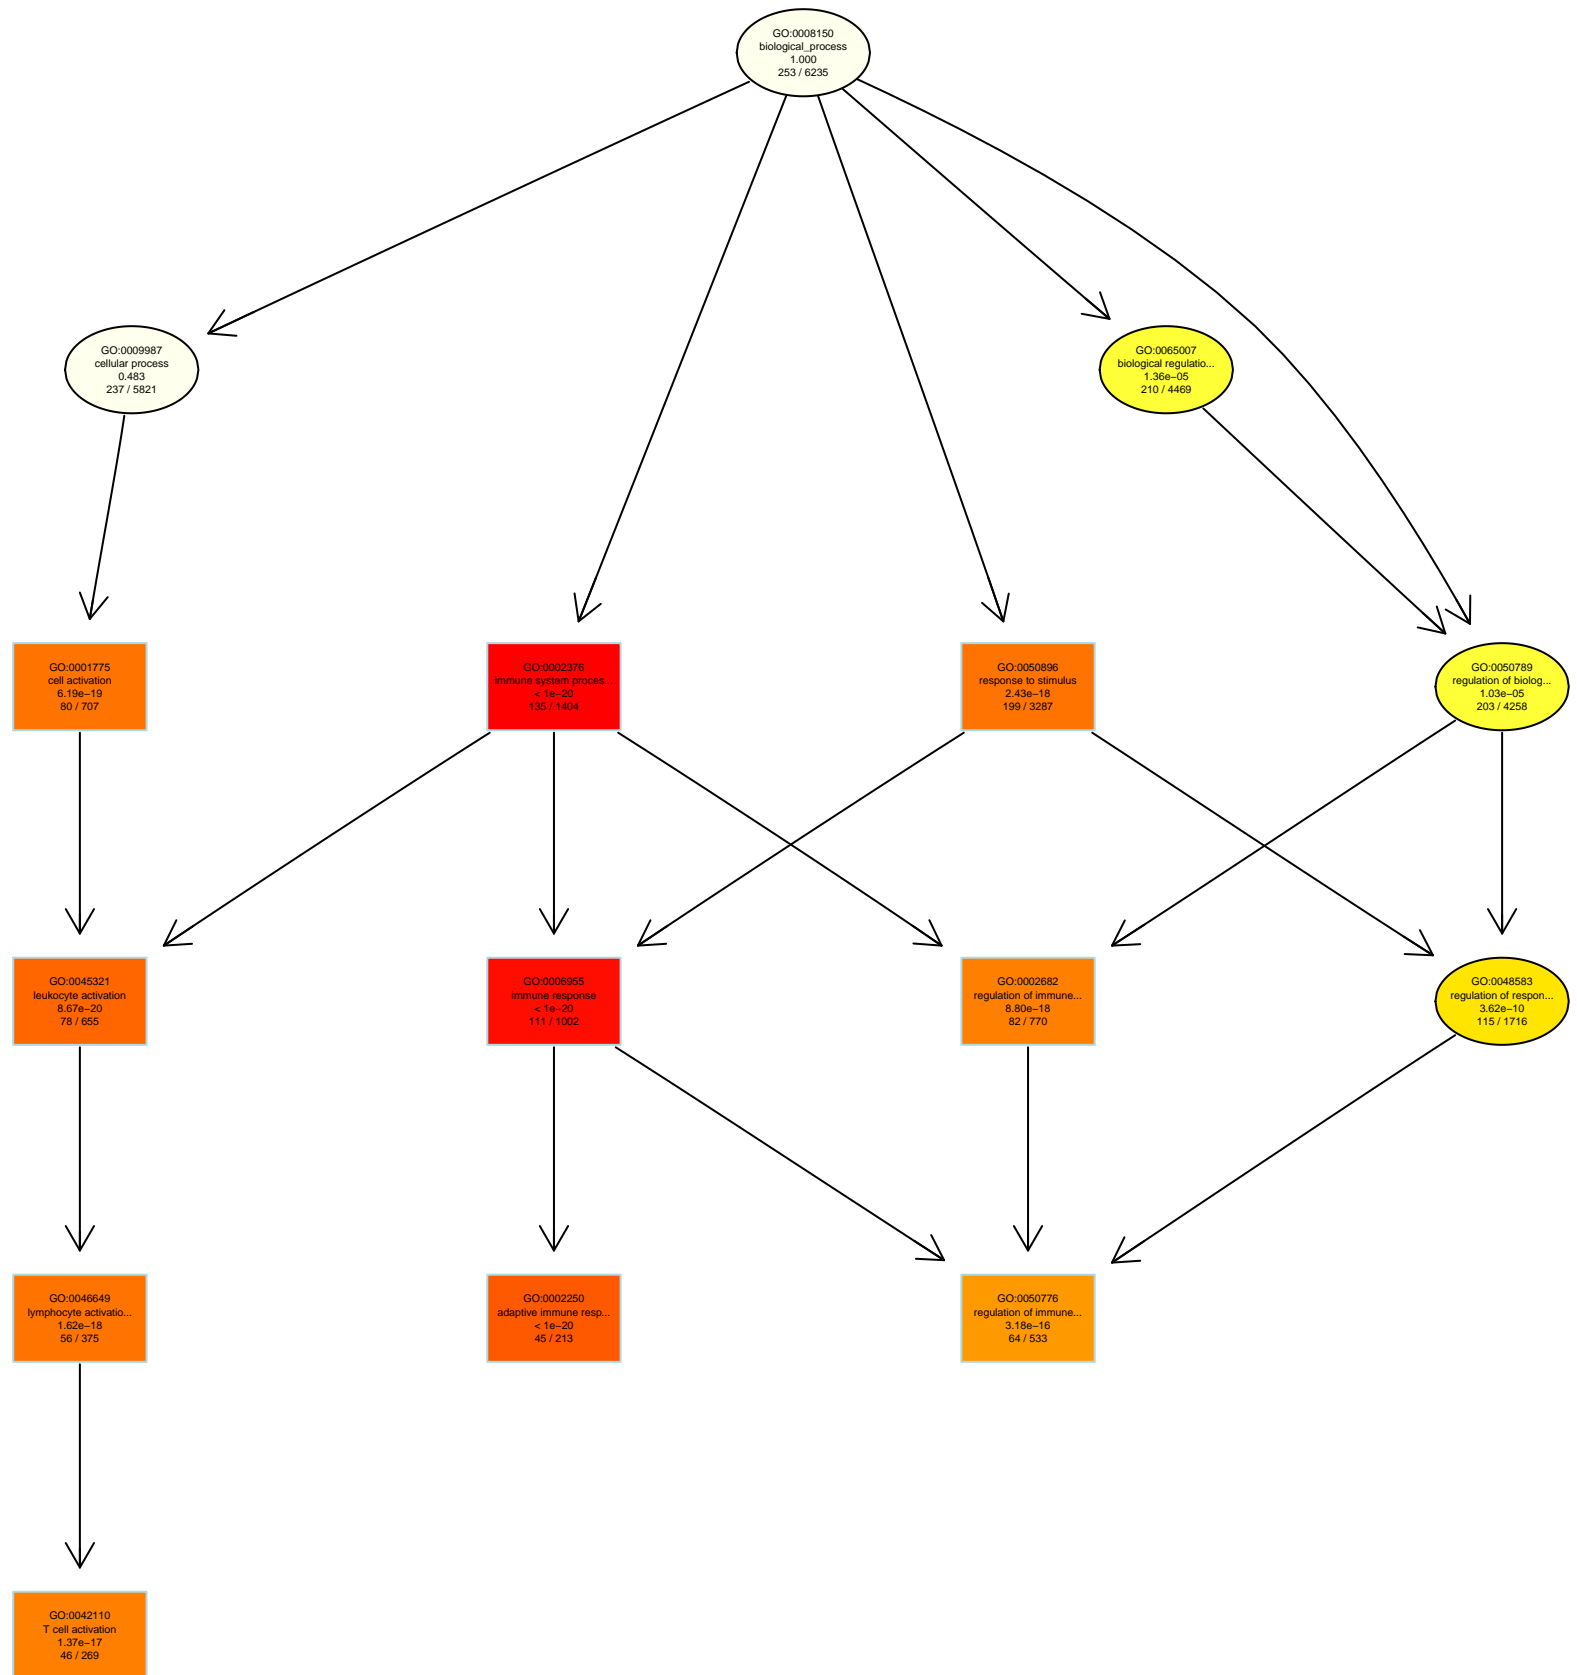

Supplement: 41598_2022_8255_MOESM6_ESM.pdf [file 41598_2022_8255_MOESM6_ESM.pdf]
