# Supplementary material for: Analysis of gut microbiome profiles in common marmosets (Callithrix jacchus) in health and intestinal disease
Source: PubMed Central journal article supplement (PMC8924212; doi:10.1038/s41598-022-08255-4), 2022-03-15

Supp. Fig. 7 Biological processes enriched in the jejunum of non-IBD cases

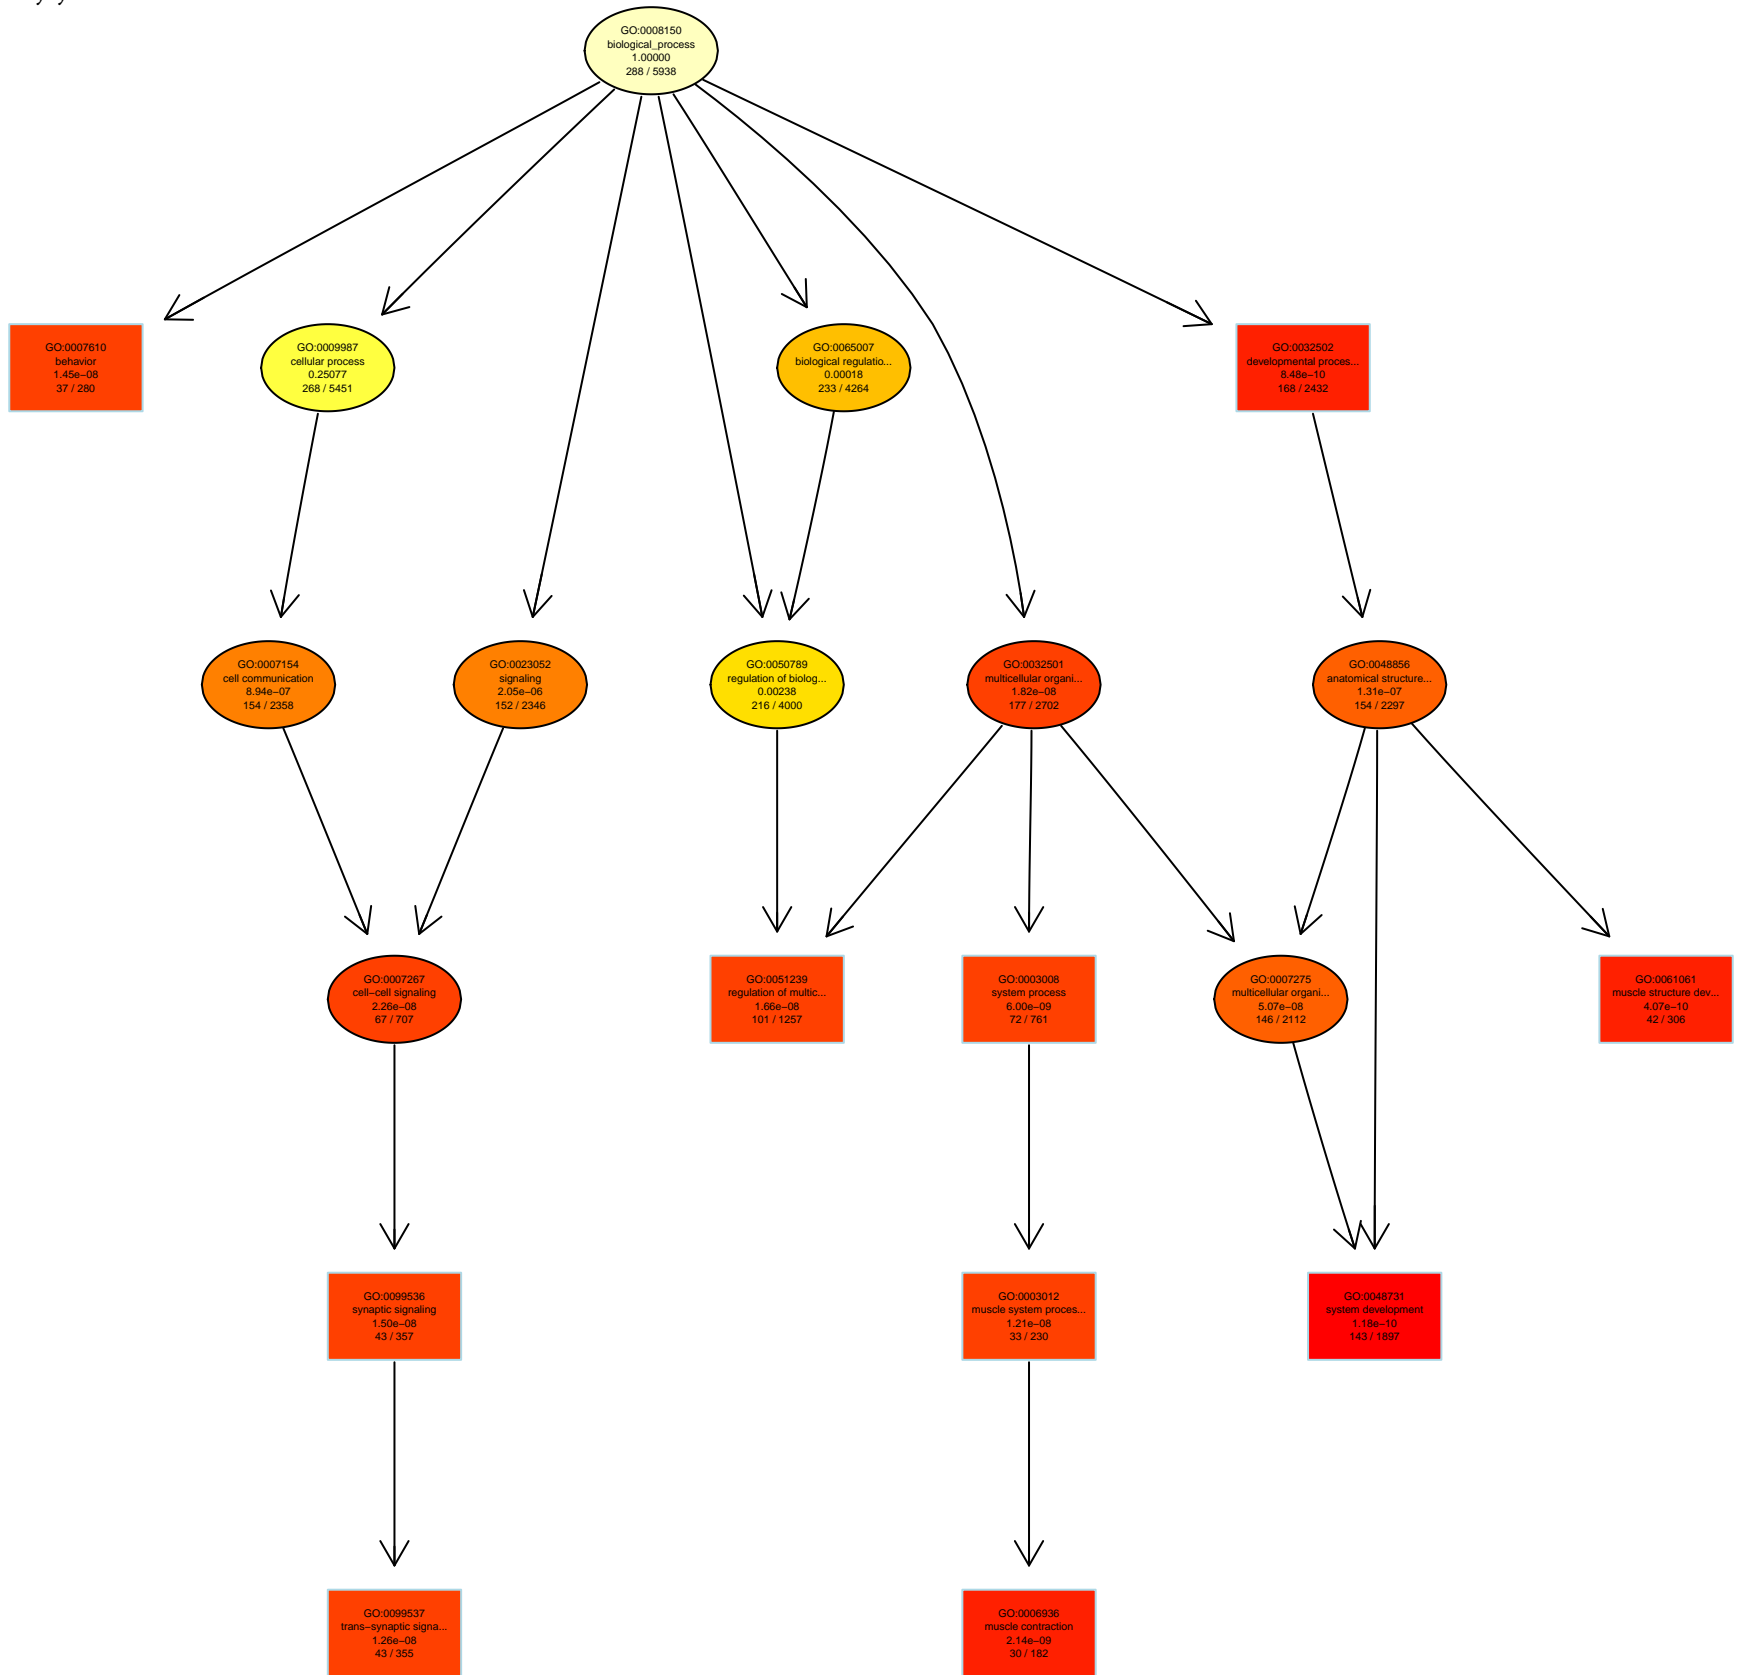

Supplement: 41598_2022_8255_MOESM7_ESM.pdf [file 41598_2022_8255_MOESM7_ESM.pdf]
